1 **Performance and impact of using a rapid molecular test to detect *Chlamydia***  
2 ***trachomatis* and *Neisseria gonorrhoeae* in women suspected of having pelvic**  
3 **inflammatory disease**

4  
5 **Short running title:** *C.trachomatis* and *N.gonorrhoeae* in PID

6  
7 Munrós J, MD, PhD<sup>1,2\*</sup>; Vergara A, PharmD<sup>3,\*,#</sup>, Bataller E, MD, PhD<sup>1</sup>; Restovic G,  
8 MSc<sup>4</sup>; García-Lorenzo B, PhD<sup>4</sup>; Álvarez-Martínez MJ, MD, PhD<sup>2,3</sup>; Mira A, PharmD,  
9 PhD<sup>5</sup>; Carmona F, MD, PhD<sup>1</sup>; Vila J, PharmD, PhD<sup>2,3</sup>, Bosch J, MD, PhD<sup>2,3</sup>.

10

11 <sup>1</sup>Department of Gynecology. Institut Clínic of Gynecology, Obstetrics and  
12 Neonatology. Hospital Clínic of Barcelona. University of Barcelona. Barcelona, Spain.

13 <sup>2</sup>Institut de Salut Global Barcelona – ISGlobal. Barcelona, Spain.

14 <sup>3</sup>Department of Clinical Microbiology, Biomedical Diagnostic Center (CDB), Hospital  
15 Clínic of Barcelona. University of Barcelona. Barcelona, Spain.

16 <sup>4</sup>Assessment of Innovations and New Technologies Unit. Hospital Clinic of Barcelona.  
17 University of Barcelona, Barcelona, Spain.

18 <sup>5</sup>Biomedical Diagnostic Center (CDB), Hospital Clínic of Barcelona. University of  
19 Barcelona. Barcelona, Spain.

20 #Correspondence address: Department of Clinical Microbiology, Biomedical Diagnostic  
21 Center (CDB), Hospital Clínic of Barcelona. University of Barcelona. Barcelona, Spain.

22 Villarroel, 170. 08036 Barcelona, Spain. Tel: +34-932275522; e-mail:

23 [VERGARA@clinic.cat](mailto:VERGARA@clinic.cat)

24 \*JM and AV contributed equally to this paper.

26 **ABSTRACT**

27

28 **Objective**

29 The diagnosis of pelvic inflammatory disease (PID) is challenging. Testing for  
30 *Chlamydia trachomatis* (CT) and *Neisseria gonorrhoeae* (NG) in the lower genital tract  
31 is recommended, since a positive result supports the diagnosis. The aim of this study  
32 was to investigate the prevalence of CT/NG infection in women suspected of having  
33 PID and the usefulness of a rapid molecular test to detect CT/NG.

34

35 **Methods**

36 This observational study included 3 groups of patients: mild-to-moderate PID  
37 (n=33), severe PID (n=29) and non-specific lower abdominal pain (NSAP) (n=13).  
38 CT/NG infection were analyzed using a standard and a rapid test. A cost analysis was  
39 carried out.

40

41 **Results**

42 The presence of CT/NG was determined in 75 endocervical and urine samples.  
43 Endocervical samples of 19 patients (25.3%) were CT/ NG positive (two cases of co-  
44 infection). NG was not detected in urine in one case. Concordance between rapid and  
45 standard tests was 100%. However, the mean time to achieve results was shorter with  
46 the rapid test: 2.22 vs. 24.37 hours, respectively ( $p < 0.001$ ). No significant differences  
47 were observed in the presence of CT/NG in mild-to-moderate compared to severe PID.  
48 Costs differed according only to disease severity but to the presence of CT/NG. Only  
49 one patient with NSAP was positive for CT.

50 **Conclusions**

51           Rapid molecular tests could help with the diagnosis of PID in sexually active  
52 women in clinical settings in which a standard technique is not available. Nonetheless, a  
53 positive test for CT/NG may not be determinant of the clinical management. The only  
54 cost difference relates to disease severity.

55

56

57 **Keywords:** *Chlamydia trachomatis*, molecular techniques, *Neisseria gonorrhoeae*,  
58 pelvic inflammatory disease.

## 59 INTRODUCTION

60 Pelvic inflammatory disease (PID) is a clinical syndrome of the upper female  
61 genital tract which is mainly due to polymicrobial infection ascending from the  
62 endocervix<sup>1,2</sup>. PID may be also a sexually transmitted disease (STD), with *Neisseria*  
63 *gonorrhoeae* (NG) and *Chlamydia trachomatis* (CT) being the most common causal  
64 agents. Other pathogens causing PID are *Mycoplasma genitalium* (MG) and  
65 microorganisms from the vaginal microbiota<sup>1,3-6</sup>.

66 The diagnosis of PID may be challenging because of the lack of definitive  
67 diagnostic criteria<sup>7</sup>. Moreover, patients may report a wide range of clinical  
68 manifestations, from mild symptoms to very severe disease<sup>1,2,8,9</sup>, which may be  
69 confounded with other etiologies, leading to misdiagnosis and treatment delay and  
70 short- (tubo-ovarian abscess and pelvic peritonitis) or long-term complications  
71 (impaired fertility, ectopic pregnancy and chronic pelvic pain)<sup>1</sup>. Furthermore, PID  
72 represents a significant economic burden considering its management and follow-up  
73 and possible long-term complications<sup>4,7,10-13</sup>. Therefore, guidelines strongly recommend  
74 the initiation of presumptive medical management and early antibiotic treatment in  
75 suspected PID cases<sup>2,14,15</sup>.

76 Testing for CT and NG in the lower genital tract is recommended, and while  
77 their absence does not exclude PID, a positive result would support the  
78 diagnosis<sup>1,2,5,9,14,15</sup>. However, standard methods for determining the presence of CT and  
79 NG are not available in all clinical settings, and are costly and require a lengthy period  
80 from sample collection to result obtainment, thereby limiting their use in the clinical  
81 management of PID<sup>1,16</sup>. Therefore, the use of a rapid molecular test for CT and NG  
82 detection could help in the diagnosis and management of this gynecological pathology.

83 Results would be available more rapidly to take medical decisions for the clinical  
84 management of patients with suspected PID compared with the standard methods.

85 The aim of this study was to investigate the prevalence of CT and NG infection  
86 in women suspected of having PID and the usefulness of a rapid molecular test to detect  
87 CT and NG for the diagnosis and clinical management of PID.

88

## 89 **MATERIALS AND METHODS**

### 90 **Study design and subjects**

91 In this observational study, 75 women with suspected PID or non-specific lower  
92 abdominal pain (NSAP) were prospectively recruited in a tertiary health care center  
93 from April 2016 to April 2017. The study was approved by the Ethics Committee of the  
94 hospital (HCB/2016/0171). All women provided written informed consent.

95 All women meeting clinical criteria for PID diagnosis according to international  
96 guidelines<sup>2,14,15</sup> or who referred NSAP in the emergency department (ED) were asked to  
97 participate. The following epidemiological data were recorded: age, tobacco use,  
98 previous STD and number of pregnancies.

99 Patients were managed according to the protocol of the Gynecology Department  
100 for the management of PID based on international guidelines<sup>2,14,15</sup>. The clinical criteria  
101 for initiating presumptive treatment for PID in a sexually active woman at risk of STD  
102 who referred pelvic or lower abdominal pain were cervical motion tenderness or uterine  
103 or adnexal tenderness. The following complementary tests were performed in women  
104 fulfilling the clinical criteria for PID: blood analysis to determine white blood cell count  
105 (WBC), prothrombin time (PT), and C reactive protein (CRP) and screening for other  
106 STDs (human immunodeficiency virus, hepatitis B and syphilis); vaginal and urine

107 cultures, endocervical and urine tests for CT and NG, and transvaginal ultrasonography  
108 (TUS). Complementary imaging tests were performed if considered clinically  
109 necessary. Pregnancy tests were also performed in premenopausal women. The  
110 following criteria were used to support the diagnosis: body temperature  $>38^{\circ}\text{C}$ ,  
111 mucopurulent cervical discharge or cervical friability and elevated CRP value.

112 Patients were classified as having mild-to-moderate or severe PID according to  
113 clinical symptoms and signs and complementary test results<sup>3,17,18</sup>. Severe PID was  
114 defined in this study as the presence of severe symptoms or signs and/or the presence of  
115 tubo-ovarian abscess at imaging tests<sup>3,17</sup>. Patients who didn't meet these criteria were  
116 classified as mild-to-moderate PID<sup>17,18</sup>. Patients with severe PID were admitted to  
117 hospital, while mild-to-moderate cases were managed as outpatients in cases of non-  
118 pregnant women with the absence of severe clinical manifestations, nausea/vomiting  
119 and comorbidities<sup>1,3,14,17,18</sup>.

120 The antibiotic regimen was chosen according to the hospital protocol based on  
121 local antimicrobial sensitivity (Appendix I). Surgery was considered in cases of  
122 diagnostic uncertainty or severe cases presenting parenteral treatment failure.

123 Follow-up was performed 6 weeks after diagnosis to evaluate clinical symptoms  
124 and patient improvement. CT and NG diagnosis tests were repeated in patients  
125 previously positive for CT and/or NG.

126 Additionally, all women referring NSAP in the ED, in whom other causes for  
127 these symptoms were excluded but did not meet all PID criteria<sup>2,14,15</sup>, were also invited  
128 to participate in the study. In these cases, only blood analysis for WBC, PT and CRP  
129 evaluation, and urine test and endocervical swab for detection of CT and NG were  
130 performed. Analgesic treatment was provided, if necessary. Follow-up was also

131 performed 6 weeks after diagnosis. If CT and/or NG were detected, the women were  
132 promptly informed and appropriate treatment was indicated.

133

#### 134 **Sample collection and analysis**

135 Endocervical samples were collected with nylon swabs for the detection of CT  
136 and NG. Urine samples were collected for culture in cystine–lactose–electrolyte-  
137 deficient agar and for the detection of CT and NG. Gram-stained vaginal smears were  
138 analyzed to evaluate potential bacterial vaginosis using the Nugent score.[19]  
139 Additionally, intraoperative intraabdominal fluid samples from patients undergoing  
140 surgery were cultured.

141

#### 142 **Molecular pathogens detection**

143 DNA from endocervical and urine samples was extracted with the Biorobot  
144 EZ1® (Qiagen, GmbH, Hilden, Germany). CT and NG were detected with real-time  
145 polymerase chain reaction [Anyplex® CT/NG Real-time Detection kit (Seegene, Seoul,  
146 Korea)] using a real-time thermal cycler, SmartCycler® (Cepheid, Sunnyvale,  
147 California, US). The same samples were used to directly detect CT and NG, without  
148 previous DNA extraction, with the GeneXpert® CT/NG assay (Cepheid, Sunnyvale,  
149 California, US). Molecular tests for CT and NG were performed immediately after  
150 collection with GeneXpert® or three times per week (with refrigeration for less than 48  
151 hours) with Anyplex®.

152 The conventional and GeneXpert® results were compared, and the time in hours  
153 from sample reception at the Microbiology Laboratory until result obtainment was  
154 registered for both methods. Samples and DNA were stored at -20°C for further

155 analysis. *Mycoplasma genitalium* and *Trichomonas vaginalis* were retrospectively  
156 tested, with the RealCycler® Monotest MGTVUS (Progenie, Valencia, Spain) in a  
157 SmartCycler®.

158

### 159 **Cost analysis**

160 Based on the results and information obtained from the clinical study, a cost  
161 study was carried out<sup>20</sup> considering only direct costs. The economic variables included  
162 the type and frequency of resources used by each patient including: diagnostic tests,  
163 pharmacologic treatments, need for hospitalization, visits, diagnostic imaging tests and  
164 laboratory tests. Unit costs in Euros 2018 for each resource used were obtained from the  
165 hospital administrative database.

166 The mean cost per patient was computed using individual patient data.  
167 Moreover, cost by disease severity (NSAP, mild-to-moderate PID, severe PID), and the  
168 presence of CT and/or NG (at least one positive vs. both negative) was also calculated.

169

### 170 **Statistical analysis**

171 Statistical analysis was performed with the Statistical Package for the Social  
172 Sciences software, v20.0 for Windows (SPSS, Chicago, Illinois). Continuous variables  
173 were compared using the parametric Student's T-test or one-way ANOVA with the  
174 Bonferroni post hoc test and presented as mean and standard deviations, or the  
175 nonparametric Mann-Whitney U test and presented as median with interquartile range  
176 (ie. 25<sup>th</sup>-75<sup>th</sup> percentiles). Categorical variables were compared using the Chi-squared  
177 test or Fisher's exact test and presented as total count and relative percentages (%).  
178 Statistical significance was defined as a p-value <0.05. Cohen's kappa coefficient was



179 calculated to assess concordance between the laboratory methods to detect CT/NG.

180

## 181 **RESULTS**

### 182 **Characteristics of the study population**

183 A total of 75 patients were included in the study and classified into three groups:  
184 mild-to-moderate PID (n=33), severe PID (n=29) and NSAP with no clinical suspicion  
185 of PID (n=13).

186 Table 1 shows baseline characteristics, findings at physical examination,  
187 laboratory tests and TUS of the patients included. All pregnancy tests performed in  
188 women of reproductive age were negative as was screening for other STDs in all the  
189 patients included.

190 **Table 1.** Comparison of baseline characteristics, findings at physical examination, laboratory tests, and transvaginal ultrasonography  
 191 between patients with pelvic inflammatory disease (PID) vs. non-specific abdominal pain (NSAP), and between patients with mild-to-  
 192 moderate PID vs. severe PID.

|                                                     | PID (n=62)          | NSAP<br>(n=13)   | p-value | Mild-to-moderate<br>PID (n=33) | Severe PID<br>(n=29) | p-value |
|-----------------------------------------------------|---------------------|------------------|---------|--------------------------------|----------------------|---------|
| <b>Baseline characteristics</b>                     |                     |                  |         |                                |                      |         |
| Age (years)                                         | 33.00 (25.75-40.25) | 28 (24.00-35.00) | NS      | 32.00 (24.50-39.50)            | 35.00 (27.00-41.50)  | NS      |
| Tobacco use                                         | 27 (43.5%)          | 1 (7.7%)         | NS      | 13 (39.4%)                     | 14 (48.3%)           | NS      |
| Past STD                                            | 14 (22.6%)          | 3 (23.1%)        | NS      | 6 (18.2%)                      | 8 (27.6%)            | NS      |
| Nulliparity                                         | 35 (56.5%)          | 10 (76.9%)       | NS      | 20 (60.6%)                     | 15 (51.7%)           | NS      |
| <b>Physical examination</b>                         |                     |                  |         |                                |                      |         |
| Cervical motion tenderness<br>or uterine tenderness | 44 (71%)            | 4 (30.8%)        | 0.010   | 23 (69.7%)                     | 21 (72.4%)           | NS      |
| Adnexal tenderness                                  | 37 (59.7%)          | 8 (61.5%)        | NS      | 16 (48.5%)                     | 21 (72.4%)           | 0.05    |
| Body temperature >38°C                              | 34 (54.8%)          | 3 (23.1%)        | NS      | 16 (48.5%)                     | 18 (62.1%)           | NS      |

|                                         |            |           |       |            |            |       |
|-----------------------------------------|------------|-----------|-------|------------|------------|-------|
| Abnormal cervical                       |            |           |       |            |            |       |
| mucopurulent discharge                  | 30 (48.4%) | 2 (15.4%) | NS    | 17 (51.5%) | 13 (44.8%) | NS    |
| <b>Laboratory tests</b>                 |            |           |       |            |            |       |
| Leukocytosis (>11 x 10 <sup>9</sup> /L) | 36 (58.1%) | 1 (7.7%)  | 0.001 | 14 (42.4%) | 22 (75.9%) | 0.008 |
| PT < 70%                                | 16 (27.1%) | 0 (0%)    | NS    | 9 (29%)    | 7 (25%)    | NS    |
| CRP > 5 mg/dL                           | 39 (62.9%) | 1 (8.3%)  | 0.001 | 18 (54.5%) | 21 (72.4%) | NS    |
| <b>TUS</b>                              |            |           |       |            |            |       |
| Pyosalpinx                              | 24 (38.7%) | 0         | 0.007 | 0          | 24 (82.8%) | 0.000 |
| TOA                                     | 11 (17.7%) | 0         | NS    | 0          | 11 (37.9%) | 0.000 |

193

194 The values are median (IQR) or n (%). Continuous variables were compared using the nonparametric Kruskal-Wallis test. Categorical  
 195 variables were compared using the Chi-square test or Fisher's exact test.

196 NS: not significant.

197 PID: pelvic inflammatory disease.

198 NSAP: non-specific abdominal pain.

199 STD: sexually transmitted disease.

- 200 PT: prothrombin time.
- 201 CRP: C-reactive protein.
- 202 TUS: transvaginal ultrasonography.
- 203 TOA: tubo-ovarian abscess.

## 204 **Microbiological diagnosis**

205 Table 2 shows the results of the microbiological tests performed in each group  
206 of patients. For statistical purposes, CT/NG test results were also classified as at least  
207 one positive (CT and/or NG) or all negative (for both CT and NG). Endocervical swabs  
208 and urine samples from all patients were tested for CT/NG. Regarding endocervical  
209 samples, 19 patients (19/75, 25.3%) presented infection by either CT (14/75, 18.7%)  
210 and/or NG (7/75, 9.3%) (two cases of co-infection). Urine failed to detect NG in one  
211 case with NG in the endocervical swab. Concordance between the endocervical and  
212 urine samples was 98.7% with a Cohen's kappa coefficient of 0.93. Concordance  
213 between the Anyplex® CT/NG and GeneXpert® CT/NG assays was 100%. However,  
214 the mean time to results was significantly shorter for GeneXpert® CT/NG than for  
215 Anyplex®CT/NG: 2.22 hours vs. 24.37 hours, respectively ( $p<0.001$ ).

216 Urine cultures of all the patients were negative. Intraabdominal fluid was  
217 cultured in all patients requiring surgery (three with mild-to-moderate PID and six with  
218 severe PID), with four patients with severe PID being positive: 2 *E. coli*, 1 *Bacteroides*  
219 *fragilis* and 1 *Mycoplasma hominis*. Intraabdominal fluid obtained from patients who  
220 required surgery was also tested for CT/NG: two patients with mild-to-moderate PID  
221 were positive for CT and NG, respectively; and one patient with severe PID was  
222 positive for NG (who was also positive for *E. coli* at intraabdominal fluid culture).

223 No *Trichomonas vaginalis* was detected and only one case of *Mycoplasma*  
224 *genitalium* was detected in a patient with CT.

225 **Table 2.** Comparison of microbiological results between patients with pelvic inflammatory disease (PID) vs. non-specific abdominal pain  
 226 (NSAP) and between patients with mild-to-moderate PID vs. severe PID.

227

|                                    | PID<br>(n=62) | NSAP<br>(n=13) | p-value | Mild-to-moderate PID<br>(n=33) | Severe PID<br>(n=29)   | p-value |
|------------------------------------|---------------|----------------|---------|--------------------------------|------------------------|---------|
| <b>CT and NG tests</b>             |               |                |         |                                |                        |         |
| CT positive                        | 13 (21%)      | 1 (7.7%)       | NS      | 7 (21.2%)                      | 6 (20.7%)              | NS      |
| NG positive                        | 7 (11.3%)     | 0 (0%)         | NS      | 4 (12.1%)                      | 3(10.3%)               | NS      |
| At least one positive <sup>†</sup> | 18 (29%)      | 1 (7.7%)       | NS      | 10 (30.3%) <sup>§</sup>        | 8 (27.6%) <sup>¶</sup> | NS      |
| CT and NG negative <sup>‡</sup>    | 44 (71%)      | 12 (92.3%)     |         | 23 (69.7%)                     | 21 (72.4%)             |         |
| <b>Bacterial vaginosis</b>         | 13 (21%)      | 0 (0.0%)       | NS      | 4 (12.1%)                      | 9 (31.0%)              | NS      |

228

229 The values are n (%).Categorical variables were compared using the Chi-square test or Fisher's exact test.

230 NS: not significant.

231 PID: pelvic inflammatory disease.

232 NSAP: non-specific abdominal pain.

233 CT: *Chlamydia trachomatis*.

234 NG: *Neisseria gonorrhoeae*.

235 †At least one positive: includes patients with a positive result for CT and/or NG tests.

236 ‡CT and NG negative: includes patients with a negative CT and NG test result.

237 §One patient in the mild-to-moderate PID group was positive for both CT and NG.

238 ¶One patient in the severe PID group was positive for both CT and NG.

## 239 **Clinical management of patients and follow-up**

240 Of 14 patients hospitalized with mild-to-moderate PID, three required surgery  
241 due to unsatisfactory evolution, with intraoperative findings of salpingitis confirming  
242 PID. Among the patients receiving outpatient treatment (n=19), one required  
243 hospitalization due to unsatisfactory evolution. The median hospital stay of the women  
244 with mild-to-moderate PID was 4.5 days (range: 1-16).

245 All patients with severe PID were hospitalized except one, who refused to be  
246 admitted. Six of these patients required surgical treatment. The median hospital stay in  
247 these patients was 6 days (range: 3 to 15).

248 Finally, among 13 patients with NSAP with no clinical suspicion of PID, one  
249 was positive for CT. Appropriate treatment was administered, and the 6-week follow-up  
250 test was negative.

251 All the patients were followed at 6 weeks after treatment initiation. At this time  
252 endocervical samples and urine were only obtained from patients with a previously  
253 positive CT and/or NG result. All samples were negative except for that of one  
254 asymptomatic woman, who was positive for CT. She had been classified in the mild-to-  
255 moderate PID group and had previously been positive for CT. Nonetheless, as this  
256 woman was a sex worker, reinfection was more likely than persistent infection.

257

## 258 **Cost analysis**

259 Table 3 provides the total cost and the mean cost per patient classified by  
260 severity of the condition and the presence or absence of CT and/or NG.

261 There were significant differences in costs across severity levels but not between  
262 the presence or absence of CT and/or NG. Regarding infection severity, patients with



263 severe PID presented the highest mean cost per patient, with the NSAP group showing  
264 the lowest mean cost per patient. It should be noted that surgery was more frequent  
265 among patients diagnosed with severe PID (20.7%) compared to those with mild-to-  
266 moderate PID (9%). This must have increased the mean cost per patient, especially  
267 among patients with severe PID who were negative for both CT and NG, five of whom  
268 required surgery (23.8%) compared with patients with severe PID with positive CT  
269 and/or NG results (12.5%).

270 **Table 3.** Total and mean costs per patient according to the study group and the result of  
 271 the CT and NG tests.

272

| CT and NG tests            | Study group          | Number<br>of<br>patients | Total<br>cost† | Mean cost <sup>a</sup><br>per<br>patient |
|----------------------------|----------------------|--------------------------|----------------|------------------------------------------|
|                            | NSAP                 | 1                        | 243 €          | 243 €                                    |
| CT and/or NG<br>positive   | Mild-to-moderate PID | 10                       | 19,472 €       | 1,947 €                                  |
|                            | Severe PID           | 8                        | 27,739 €       | 3,467 €                                  |
|                            | Total                | 19                       | 47,454 €       | 2,497 €                                  |
| Both CT and NG<br>negative | NSAP                 | 12                       | 3,195 €        | 266 €                                    |
|                            | Mild-to-moderate PID | 23                       | 37,010 €       | 1,609 €                                  |
|                            | Severe PID           | 21                       | 95,788 €       | 4,561 €                                  |
|                            | Total                | 56                       | 135,994€       | 2,428 €                                  |
| Total                      | NSAP                 | 13                       | 3,438 €        | 264 €                                    |
|                            | Mild-to-moderate PID | 33                       | 56,482 €       | 1,711 €                                  |
|                            | Severe PID           | 29                       | 123,528 €      | 4,259 €                                  |
|                            | Total                | 75                       | 183,448 €      | 2,445 €                                  |

273

274 Data were analyzed by Student's T-test or one-way ANOVA with the Bonferroni post  
 275 hoc test.

276 PID: pelvic inflammatory disease.

277 NSAP: non-specific abdominal pain.

278 CT: *Chlamydia trachomatis*.

279 NG: *Neisseria gonorrhoeae*.

280 †Costs are expressed in Euros 2018.

## 281 DISCUSSION

282 This study was designed to assess the presence of CT and/or NG infection in the  
283 lower genital tract of patients diagnosed with PID and NSAP, and to analyze the  
284 usefulness of a rapid molecular test to detect CT and NG for the diagnosis and clinical  
285 management of PID.

286 The diagnosis of PID is challenging<sup>7,21</sup>. According to the prevailing guidelines,  
287 all patients with suspected PID should undergo endocervical or vaginal tests for NG and  
288 CT, since a positive result supports its diagnosis<sup>1,14,15</sup>. However, in several studies no  
289 etiological agent was detected in approximately 65-75% of women with clinically  
290 diagnosed PID<sup>6,7,9</sup>. Thus, non-identification of the causal pathogen does not necessarily  
291 exclude the presence of PID<sup>2,14,15</sup>. In our study, no etiological agent was found in 71%  
292 of women diagnosed with PID, similar to previous reports<sup>6,7,9,22</sup>. Indeed, some authors  
293 have questioned whether this could represent a misdiagnosis of PID, especially in cases  
294 of mild-to-moderate PID<sup>8,9</sup>. Nonetheless, although the difficulty of case definition and  
295 diagnostic accuracy is a limitation for PID surveillance<sup>7</sup>, the present study followed the  
296 recommended diagnostic criteria for PID<sup>2,14,15</sup>.

297 Furthermore, we also included a group of patients with NSAP who did not meet  
298 the minimum criteria for suspicion of PID<sup>14</sup> in order to establish if they could be  
299 misdiagnosed cases of subclinical PID. Of the 13 patients with NSAP, only one was  
300 positive for CT (7%). We were unable to establish whether this was a case of  
301 misdiagnosed mild PID or if the lower abdominal pain was attributable to other causes.  
302 Nevertheless, PID should be considered in all these cases<sup>1</sup> taking into account that  
303 subclinical PID may be twice as common<sup>1,21,23</sup> and that milder clinical manifestations of  
304 PID have increased as rates of NG have fallen<sup>24</sup>. Therefore, the presence of CT and NG

305 in the lower genital tract should be evaluated in all sexually active women with STD  
306 risk factors who refer mild lower abdominal pain.

307 We also determined whether the use of a rapid molecular detection test could be  
308 helpful in the clinical management of patients diagnosed with PID. According to our  
309 data, concordance between rapid GeneXpert® CT/NG and standard Anyplex® CT/NG  
310 assays was 100%. However, results were more rapidly obtained with the rapid test.  
311 Despite of this fact, no differences were observed in the presence or absence of CT  
312 and/or NG in mild-to-moderate compared to severe PID. Moreover, the presence of CT  
313 and/or NG was not found to be a risk factor for a complicated clinical course (33% of  
314 patients undergoing surgery were positive for CT and/or NG compared to 30% of those  
315 not requiring surgery). Previous studies have reported similar data and recommend that  
316 PID management should be based on clinical features<sup>9,25</sup>. In the present study,  
317 hospitalization was decided according to clinical criteria<sup>1,14,15,17</sup> and all patients were  
318 treated with broad-spectrum antibiotic regimens to cover likely pathogens, including CT  
319 and NG, irrespectively of the results<sup>1,4,18</sup>. Likewise, the economic analysis showed no  
320 cost differences between CT/NG-positive and negative patients. On the contrary, similar  
321 to previous reports<sup>11,26</sup>, patients diagnosed with severe PID presented the highest mean  
322 cost per patient due to the need for more complex treatments.

323 To our knowledge, this is the first study to assess the clinical utility of a rapid  
324 molecular test for CT and NG in patients diagnosed with PID. Nonetheless, our study  
325 had some limitations. The final sample size for the specific purpose of this study was 75  
326 patients in a 12-month period obtained in a single hospital, where the study took place.  
327 It might seem a limitation but this sample is similar to previous studies<sup>22</sup>. The difficulty  
328 in obtaining a wider sample may be attributed to the fact that PID diagnosis is clinically

329 difficult and its incidence is difficult to establish due to unspecific symptoms,  
330 subclinical cases and the possibility of misdiagnosis<sup>1,7,8,21,23</sup>. Other authors have also  
331 reported the difficulty in identifying and accurately diagnosing this condition<sup>7</sup>, which  
332 may be influenced by the health seeking behavior of patients, the clinical awareness of  
333 the attending ED physician and the results of complementary tests<sup>7,8</sup>. Therefore,  
334 although all the patients included were classified into the three groups according to  
335 recommended diagnostic criteria<sup>2,14,15</sup>, the possibility of a misdiagnosis cannot be ruled  
336 out, especially in cases of mild-to-moderate PID and NSAP. Another drawback is that  
337 the results from the rapid molecular test were not available for decision-taking since  
338 they were reported at the same time as those of the standard test. Nevertheless, as  
339 described previously, patient management should be based on clinical criteria,  
340 irrespectively of the presence or absence of CT and/or NG<sup>1,2,7,14,15</sup>.

341 Our study also has several strengths. Firstly, it was a prospective study and  
342 patients were classified into the three groups according to clinical criteria<sup>2,14,15</sup>. Another  
343 important issue is that two molecular methods were compared to detect CT and NG,  
344 with total concordance between both of them. However, rapid molecular tests  
345 (GeneXpert®) require little sample manipulation as extraction, amplification and  
346 detection occur in the cartridge allowing results to be obtained in a shorter time, and  
347 they may be used in settings with limited infrastructure to develop a standard molecular  
348 technique. Finally, we compared CT and NG detection in endocervical and urine  
349 samples in order to assess the sensitivity of both samples. NG was not detected in urine  
350 in a patient with NG in the endocervical swab, thus the sensitivity for urine was slightly  
351 lower than that of endocervical samples. This is concordant with previous reports<sup>27</sup>, and

352 therefore, endocervical or vaginal samples but not urine should be used for CT and NG  
353 tests in women.

354 In conclusion, the use of a rapid molecular test for CT and NG in patients with  
355 clinical suspicion of PID and patients with NSAP could help in the differential  
356 diagnosis of abdominal pain in women at risk of STD in clinical settings in which a  
357 standard technique is not available. Moreover, the use of these tests, together with  
358 increased awareness among medical staff, might increase the diagnosis of mild or  
359 subclinical PID. Nonetheless, positive CT and/or NG test results may not be helpful for  
360 clinical management and the only cost difference relates to disease severity. Further  
361 research is warranted to assess these issues and to evaluate the usefulness of rapid  
362 molecular tests in clinical settings in which standard methods are not available.

363

#### 364 **ACKNOWLEDGMENTS**

365 This study was funded by the Hospital Clínic de Barcelona, Fundació Privada  
366 Clínic per a la Recerca Biomèdica (project number: CP041887), Barcelona Institute for  
367 Global Health (ISGlobal) and Cepheid Inc (Sunnyvale California, US). Cepheid Inc  
368 contributes economically to this project. Cepheid Inc did not participate in the study  
369 design, in the collection, analysis and interpretation of the data, in the writing of the  
370 report and in the decision to submit the paper for publication.

371

#### 372 **DISCLOSURE**

373 JM was contracted part time during six months in 2016 with funding obtained by  
374 Cepheid Inc.

376 **REFERENCES**

- 377 1. Brunham RC, Gottlieb SL, Paavonen J. Pelvic inflammatory disease. *N Engl J Med*  
378 2015;372:20139-48.
- 379 2. Ross J, Guaschino S, Cusini M, Jensen J. 2017 European guideline for the  
380 management of pelvic inflammatory disease. *Int J STD AIDS* 2018;29:108-114.
- 381 3. Ness RB, Kip KE, Hillier SL, Soper DE, Stamm CA, Sweet RL, *et al.* A cluster  
382 analysis of bacterial vaginosis-associated microflora and pelvic inflammatory  
383 disease. *Am J Epidemiol* 2005;162:585-90.
- 384 4. Soper DE. Pelvic inflammatory disease. *Obstet Gynecol* 2010;111:419-28.
- 385 5. Lis R, Rowhani-Rahbar A, Manhart LE. Mycoplasma genitalium infection and  
386 female reproductive tract disease: a meta-analysis. *Clin Infect Dis* 2015;61:418-26.
- 387 6. Price MJ, Ades AE, Welton NJ, Simms I, Macleod J, Horner PJ. Proportion of  
388 Pelvic Inflammatory Disease Cases Caused by Chlamydia trachomatis: Consistent  
389 Picture From Different Methods. *J Infect Dis* 2016;214:617-24.
- 390 7. Simms I, Stephenson JM. Pelvic inflammatory disease epidemiology: what do we  
391 know and what do we need to know? *Sex Transm Infect* 2000;76:80-7.
- 392 8. Morris GC, Stewart CM, Schoeman SA, Wilson JD. A cross-sectional study  
393 showing differences in the clinical diagnosis of pelvic inflammatory disease  
394 according to the experience of clinicians: implications for training and audit. *Sex*  
395 *Transm Infect* 2014;90:445-51.
- 396 9. Goller JL, De Livera AM, Fairley CK, Guy RJ, Bradshaw CS, Chen MY, *et al.*  
397 Characteristics of pelvic inflammatory disease where no sexually transmitted  
398 infection is identified: a cross-sectional analysis of routinely collected sexual health  
399 clinic data. *Sex Transm Infect* 2017;93:68-70.



- 400 10. Blandford JM, Gift TL. Productivity losses attributable to untreated chlamydial  
401 infection and associated pelvic inflammatory disease in reproductive-aged women.  
402 *Sex Transm Dis* 2006;33 (10 Suppl):S117-21.
- 403 11. Trent M, Ellen JM, Frick KD. Estimating the direct costs of pelvic inflammatory  
404 disease in adolescents: a within-system analysis. *Sex Transm Dis* 2011;38:326-8.
- 405 12. Ong KJ, Soldan K, Jit M, Dunbar JK, Woodhall SC. Chlamydia sequelae cost  
406 estimates used in current economic evaluations: does one-size-fit-all? *Sex Transm*  
407 *Infect* 2017;93:18-24.
- 408 13. Aghaizu A, Adams EJ, Turner K, Kerry S, Hay P, Simms I, *et al.* What is the cost  
409 of pelvic inflammatory disease and how much could be prevented by screening for  
410 chlamydia trachomatis? Cost analysis of the Prevention of Pelvic Infection (POPI)  
411 trial. *Sex Transm Infect* 2011;87:312-7.
- 412 14. Workowski KA, Bolan GA; Centers for Disease Control and Prevention. Sexually  
413 transmitted diseases treatment guidelines, 2015. *MMWR Recomm Rep* 2015;64(RR-  
414 03):1-137. Erratum in: *MMWR Recomm Rep* 2015;64:924.
- 415 15. Ross J, Cole M, Evans C, Lyons D, Dean G, Cousins S, *et al.* United Kingdom  
416 National Guideline for the Management of Pelvic Inflammatory Disease (2019  
417 Interm Update). Available from: [www.bashhguidelines.org](http://www.bashhguidelines.org)
- 418 16. Turner KM, Round J, Horner P, Macleod J, Goldenberg S, Deol A, *et al.* An early  
419 evaluation of clinical and economic costs and benefits of implementing point of  
420 care NAAT tests for Chlamydia trachomatis and Neisseria gonorrhoea in  
421 genitourinary medicine clinics in England. *Sex Transm Infect* 2014;90:104-11.
- 422 17. Ness RB, Soper DE, Holley RL, Peipert J, Randall H, Sweet RL, *et al.*  
423 Effectiveness of inpatient and outpatient treatment strategies for women with pelvic

- 424 inflammatory disease: results from the Pelvic Inflammatory Disease Evaluation and  
425 Clinical Health (PEACH) Randomized Trial. *Am J Obstet Gynecol* 2002;186:929-  
426 37.
- 427 18. Savaris RF, Fuhrich DG, Duarte RV, Franik S, Ross JDC. Antibiotic therapy for  
428 pelvic inflammatory disease. *Cochrane Database Syst Rev* 2017;4:CD010285. doi:  
429 10.1002/14651858.CD010285.pub2.
- 430 19. Nugent RP, Krohn MA, Hillier SL. Reliability of diagnosing bacterial vaginosis is  
431 improved by standardized method of Gram stain interpretation. *J Clin Microbiol*  
432 1991;29:297-301.
- 433 20. Drummond MF, Sculpher MJ, Claxton K, Stoddart GL, Torrance GW. Methods for  
434 the economic evaluation of health care programmes. Oxford, UK. Oxford  
435 University Press, 2015 (Fourth Edition).
- 436 21. Sweet RL. Pelvic Inflammatory Disease: Current Concepts of Diagnosis and  
437 Management. *Curr Infect Dis Rep* 2012. Doi: 10.1007/s11908-012-0243-y.
- 438 22. Burnett AM, Anderson CP, Zwank MD. Laboratory-confirmed gonorrhea and/or  
439 chlamydia rates in clinically diagnosed pelvic inflammatory disease and cervicitis.  
440 *Am J Emerg Med* 2012;30:1114-7.
- 441 23. Wiesenfeld HC, Sweet RL, Ness RB, Krohn MA, Amortegui AJ, Hillier SL.  
442 Comparison of acute and subclinical pelvic inflammatory disease. *Sex Transm Dis*  
443 2005;32:400-5.
- 444 24. European Centre for Disease Prevention and Control. Sexually transmitted  
445 infections in Europe 1990-2010. Stockholm: ECDC; 2012.

- 446 25. Jamieson DJ, Duerr A, Macasaet MA, Peterson HB, Hillis SD. Risk factors for a  
447 complicated clinical course among women hospitalized with pelvic inflammatory  
448 disease. *Infect Dis Obstet Gynecol* 2000;8:88-93.
- 449 26. Smith KJ, Ness RB, Wiesenfeld HC, Roberts MS. Cost-effectiveness of alternative  
450 outpatient pelvic inflammatory disease treatment strategies. *Sex Transm Dis*  
451 2007;34:960-6.
- 452 27. Centers for Disease Control and Prevention. Recommendations for the laboratory-  
453 based detection of *Chlamydia trachomatis* and *Neisseria gonorrhoeae*-2014.  
454 *MMWR Recomm Rep* 2014;62(RR-02):1-19.
